# Supplementary material
Source: PubMed Central journal article supplement (PMC6934047)
Supplement: NIHMS1046421-supplement-Supplemental_Material.pdf [file NIHMS1046421-supplement-Supplemental_Material.pdf]

Appendix: Descriptive Statistics for Latent Growth Curve Models

Table 1. Covariance Matrix for All Observed Variables

|       | AH1   | AH2   | AH3   | AH4   | AH5   | AH6   | DEP1  | DEP2  | DEP3  | DEP4  | DEP5  | DEP6  | EN    | EA    | PA   | SA    | White | Black | Hisp | Sex  |  |
|-------|-------|-------|-------|-------|-------|-------|-------|-------|-------|-------|-------|-------|-------|-------|------|-------|-------|-------|------|------|--|
| AH1   | 2.54  |       |       |       |       |       |       |       |       |       |       |       |       |       |      |       |       |       |      |      |  |
| AH2   | 0.98  | 2.56  |       |       |       |       |       |       |       |       |       |       |       |       |      |       |       |       |      |      |  |
| AH3   | 0.76  | 1.05  | 2.42  |       |       |       |       |       |       |       |       |       |       |       |      |       |       |       |      |      |  |
| AH4   | 0.67  | 1.05  | 0.98  | 2.53  |       |       |       |       |       |       |       |       |       |       |      |       |       |       |      |      |  |
| AH5   | 0.65  | 0.88  | 0.78  | 0.81  | 3.08  |       |       |       |       |       |       |       |       |       |      |       |       |       |      |      |  |
| AH6   | 0.57  | 0.56  | 0.66  | 0.68  | 1.15  | 3.12  |       |       |       |       |       |       |       |       |      |       |       |       |      |      |  |
| DEP1  | 1.85  | 1.12  | 1.12  | 1.10  | 0.61  | 0.44  | 21.38 |       |       |       |       |       |       |       |      |       |       |       |      |      |  |
| DEP2  | 1.51  | 1.55  | 1.21  | 0.95  | 0.67  | 0.85  | 11.87 | 23.21 |       |       |       |       |       |       |      |       |       |       |      |      |  |
| DEP3  | 0.76  | 1.24  | 0.99  | 0.35  | 0.66  | 0.78  | 9.33  | 12.49 | 22.30 |       |       |       |       |       |      |       |       |       |      |      |  |
| DEP4  | 1.07  | 1.04  | 1.14  | 1.33  | 0.78  | 0.61  | 9.51  | 12.85 | 13.35 | 24.97 |       |       |       |       |      |       |       |       |      |      |  |
| DEP5  | 0.96  | 1.44  | 1.32  | 1.27  | -0.21 | 0.59  | 8.20  | 9.82  | 10.78 | 13.74 | 26.39 |       |       |       |      |       |       |       |      |      |  |
| DEP6  | 1.22  | 1.57  | 1.39  | 1.14  | 0.36  | -0.07 | 8.76  | 9.20  | 10.36 | 11.23 | 12.53 | 27.49 |       |       |      |       |       |       |      |      |  |
| EN    | 1.71  | 1.77  | 2.09  | 2.72  | 2.24  | 2.62  | 5.64  | 6.86  | 4.83  | 7.05  | 6.18  | 5.64  | 26.02 |       |      |       |       |       |      |      |  |
| EA    | 0.78  | 0.75  | 0.69  | 0.63  | 0.65  | 0.64  | 4.61  | 6.22  | 6.27  | 7.47  | 5.85  | 4.60  | 8.91  | 13.25 |      |       |       |       |      |      |  |
| PA    | 0.24  | 0.44  | 0.37  | 0.04  | 0.24  | 0.25  | 1.72  | 2.63  | 2.94  | 3.45  | 3.01  | 1.23  | 4.34  | 6.73  | 8.78 |       |       |       |      |      |  |
| SA    | 0.11  | 0.04  | 0.19  | 0.00  | 0.20  | 0.63  | 2.34  | 3.31  | 2.88  | 2.78  | 2.39  | 2.05  | 3.60  | 7.33  | 4.42 | 13.23 |       |       |      |      |  |
| White | -0.02 | -0.01 | -0.03 | -0.03 | -0.02 | -0.08 | -0.03 | -0.16 | -0.13 | -0.10 | -0.06 | -0.03 | -0.13 | 0.01  | 0.03 | 0.00  | 0.21  |       |      |      |  |
| Black | 0.01  | -0.06 | 0.00  | 0.03  | -0.06 | 0.07  | 0.09  | 0.16  | 0.15  | 0.13  | 0.06  | 0.15  | 0.21  | -0.12 | 0.03 | 0.02  | -0.15 | 0.75  |      |      |  |
| Hisp  | 0.09  | 0.21  | 0.13  | 0.14  | 0.12  | 0.17  | -0.19 | 0.29  | 0.01  | -0.04 | -0.06 | -0.15 | 0.17  | 0.08  | 0.01 | -0.03 | -0.30 | -0.49 | 1.98 |      |  |
| Sex   | 0.03  | 0.00  | 0.04  | 0.03  | 0.03  | 0.09  | -0.50 | -0.34 | -0.42 | -0.47 | -0.26 | -0.32 | 0.13  | -0.20 | 0.05 | -0.21 | -0.02 | -0.02 | 0.08 | 0.24 |  |

Note: AH=Center for Epidemiological Studies Depression Scale (CESD-10)-Anhedonia Subscale; DEP= Center for Epidemiological Studies Depression Scale (CESD-10)-Depressed Mood; EN = Childhood Trauma Questionnaire-Short Form (CTQ-SF)-Emotional Neglect Subscale; 1-6= Annual Assessments; EA = Childhood Trauma Questionnaire-Short Form (CTQ-SF)-Emotional Abuse Subscale; PA = Childhood Trauma Questionnaire-Short Form (CTQ-SF)-Physical Abuse Subscale; Emotional Neglect = Childhood Trauma Questionnaire-Short Form (CTQ-SF)-Sexual Abuse Subscale. White=Dummy coded race variable (1=white; 0=non-white); Black=Dummy coded race variable (1=black; 0=non-black); Hisp=Dummy coded race variable (1=Hispanic; 0=non-Hispanic); Sex=Dummy coded sex variable (1=Female; 0=Male).

Table 2.  
*Summary of Parameter Estimates for Growth Curve Models*

|                                 | <i>B</i> | <i>p</i> |
|---------------------------------|----------|----------|
| <b>Depressed Mood Intercept</b> |          |          |
| Sexual Abuse                    | -0.01    | .93      |
| Physical Abuse                  | -0.08    | .23      |
| Emotional Abuse                 | 0.39     | <.001    |
| Emotional Neglect               | 0.11     | .002     |
| <b>Depressed Mood Slope</b>     |          |          |
| Sexual Abuse                    | -0.02    | .33      |
| Physical Abuse                  | -0.00    | .91      |
| Emotional Abuse                 | 0.03     | .21      |
| Emotional Neglect               | -0.01    | .55      |
| <b>Anhedonia Intercept</b>      |          |          |
| Sexual Abuse                    | -0.04    | .05      |
| Physical Abuse                  | -0.00    | .86      |
| Emotional Abuse                 | 0.04     | .07      |
| Emotional Neglect               | 0.06     | <.001    |
| <b>Anhedonia Slope</b>          |          |          |
| Sexual Abuse                    | 0.01     | .05      |
| Physical Abuse                  | -0.00    | .71      |
| Emotional Abuse                 | -0.02    | .02      |
| Emotional Neglect               | 0.01     | .001     |

*Note:* Sexual Abuse = Childhood Trauma Questionnaire-Short Form (CTQ-SF)-Sexual Abuse Subscale; Physical Abuse = Childhood Trauma Questionnaire-Short Form (CTQ-SF)-Physical Abuse Subscale; Emotional Abuse = Childhood Trauma Questionnaire-Short Form (CTQ-SF)-Emotional Abuse Subscale; Emotional Neglect = Childhood Trauma Questionnaire-Short Form (CTQ-SF)-Emotional Neglect Subscale. Depressed Mood = Center for Epidemiologic Studies Depression Scale (CESD-10)-Depressed Mood Subscale; Anhedonia = Center for Epidemiologic Studies Depression Scale (CESD-10)- Anhedonia Subscale.

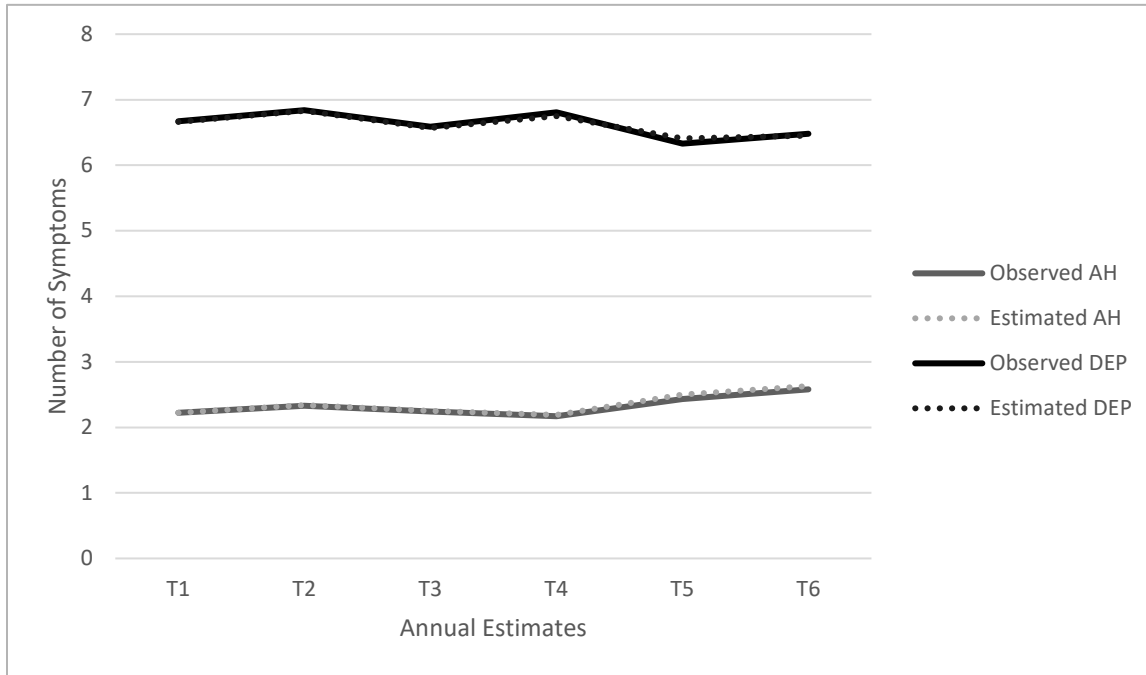

Figure 1. Estimated and actual anhedonia (AH) and depressed mood (DEP) means from the Center for Epidemiological Studies Depression (CESD-10) scale. Estimated means were derived from a latent growth curve model using Mplus version 7.2.
